# Supplementary material for: Escalation-related decision making in acute deterioration: a retrospective case note review
Source: BMJ Open. 2018 Aug 17;8(8):e022021. doi: 10.1136/bmjopen-2018-022021 (PMC6104759; doi:10.1136/bmjopen-2018-022021)
Supplement: Supplementary data [file bmjopen-2018-022021supp001.pdf]

## Data Extraction Form

[illegible]
